# Supplementary material for: Acceptor-regulated luminescence in carbazole-based charge transfer complexes
Source: Royal Society of Chemistry journal article supplement (doi:10.1039/d1ce00656h), 2021-01-01
Supplement: d1ce00656h1.pdf [file d1ce00656h1.pdf]

SI file

## **Acceptor-regulated luminescence in carbazole-based charge transfer complexes**

Si-Si Wang,<sup>a</sup> Kechang Li,<sup>c</sup> Xiaohui Ma,<sup>\*a,b</sup> Pengchong Xue<sup>\*d</sup>

- a. Department of Translational Medicine, The First Hospital of Jilin University, Changchun, P. R. China. Email: ma\_xh@jlu.edu.cn.
- b. Department of Oncology, The First Hospital of Jilin University, Changchun, P. R. China.
- c. College of Chemistry, Jilin University, Changchun, P. R. China.
- d. Tianjin Key Laboratory of Structure and Performance for Functional Molecules, College of Chemistry, Tianjin Normal University, Tianjin, P. R. China. Email: xuepengchong@126.com; hxxypc@tjnu.edu.cn

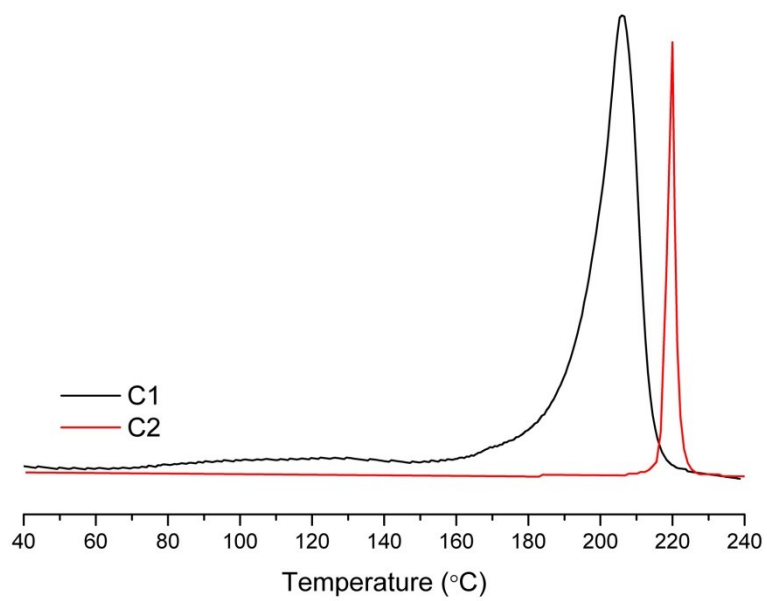

**Figure S1.** DSC curves of C1 and C2.

Table S1. Crystal data of C1 and C2.

| Identification code                       | C1                                                            | C2                                              |
|-------------------------------------------|---------------------------------------------------------------|-------------------------------------------------|
| Empirical formula                         | C <sub>44</sub> H <sub>24</sub> F <sub>8</sub> N <sub>6</sub> | C <sub>48</sub> H <sub>28</sub> N <sub>10</sub> |
| Formula weight                            | 788.69                                                        | 744.25                                          |
| Color                                     | yellow                                                        | red                                             |
| Crystal system                            | Monoclinic                                                    | Monoclinic                                      |
| Space group                               | P2 <sub>1</sub> /c                                            | P2 <sub>1</sub> /c                              |
| Unit cell dimensions<br>(Å <sup>3</sup> ) | 1757.9(3)                                                     | 1954.2(10)                                      |
| a (Å)                                     | 7.1682(7)                                                     | 15.694(5)                                       |
| b (Å)                                     | 8.2406(9)                                                     | 7.226(2)                                        |
| c (Å)                                     | 29.792(3)                                                     | 17.313(5)                                       |
| α (°)                                     | 90                                                            | 90                                              |
| β (°)                                     | 92.704(8)                                                     | 95.538                                          |
| α (°)                                     | 90                                                            | 90                                              |
| Z                                         | 2                                                             | 4                                               |
| Density (g/cm <sup>3</sup> )              | 1.490                                                         | 1.266                                           |
| Absorption coefficient                    | 0.120                                                         | 0.078                                           |

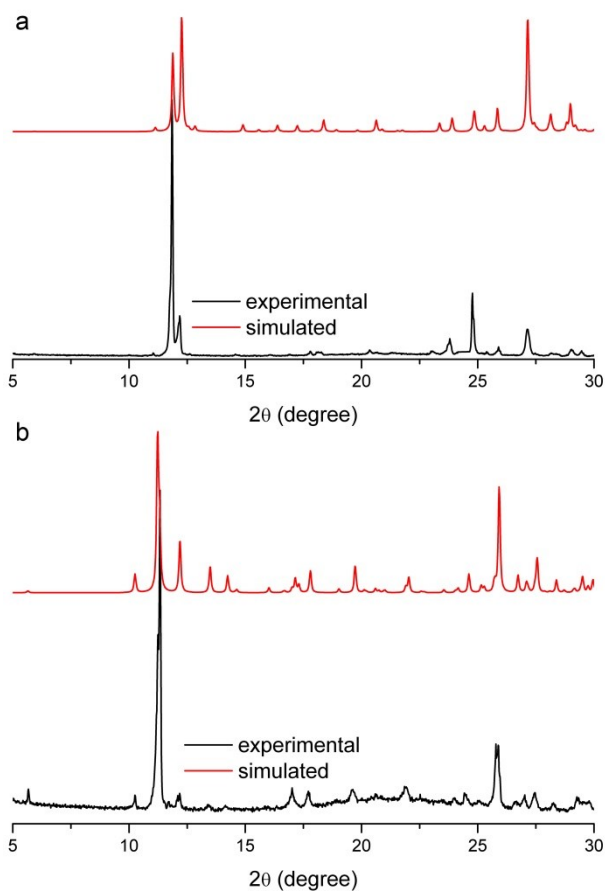

**Figure S2.** Powder XRD patterns of C1 and C2.

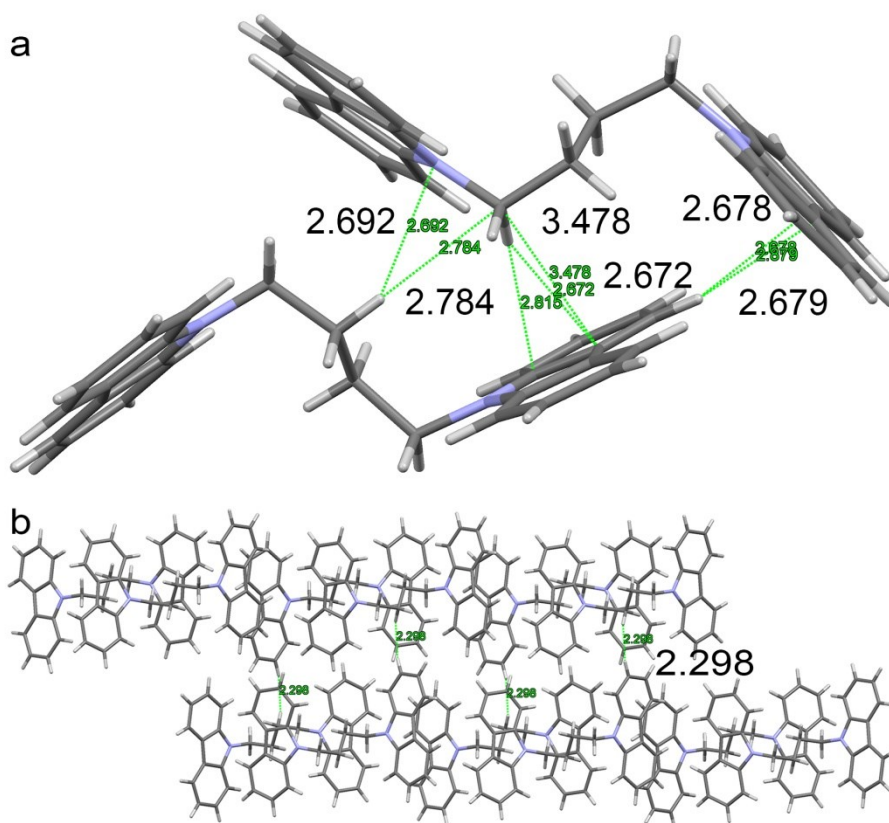

**Figure S3.** (a) Intermolecular weak interactions between two CC4C molecules in 1D stacking and (b) C-H $\cdots$ H-C interactions between 2D sheets.

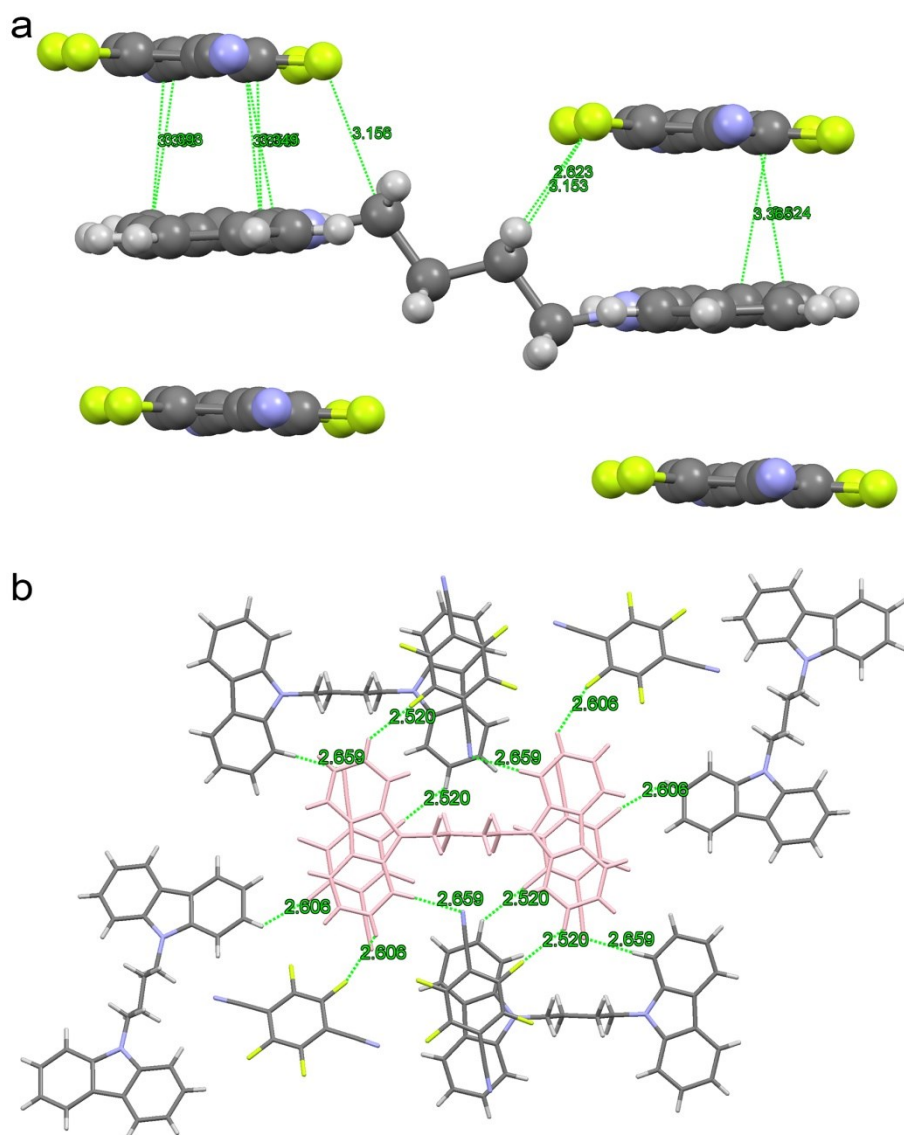

**Figure S4.** Intermolecular interactions in (a) intra-column and (b) inter-column in C1 crystal.

**Table S2.** The distance data of short interactions in Figure S2a.

| Number | Object 1 | Object 2 | Length (Å) |
|--------|----------|----------|------------|
| 1      | C12      | C6       | 3.393(2)   |
| 2      | C12      | C8       | 3.398(3)   |
| 3      | C9       | C2       | 3.349(2)   |
| 4      | C9       | C1       | 3.356(2)   |
| 5      | C10      | C1       | 3.345(2)   |
| 6      | C5       | C15      | 3.365(3)   |
| 7      | C4       | C20      | 3.324(2)   |
| 8      | F1       | C22      | 3.153(2)   |
| 9      | F1       | H22A     | 2.623      |
| 10     | C21      | F2       | 3.156(2)   |

**Table S3.** The distance data of short interactions in Figure S2b.

| Number | Object 1        | Object 2        | Length (Å) |
|--------|-----------------|-----------------|------------|
| 1      | N <sub>2</sub>  | H <sub>17</sub> | 2.659      |
| 2      | H <sub>11</sub> | F <sub>1</sub>  | 2.52       |
| 3      | F <sub>1</sub>  | H <sub>11</sub> | 2.52       |
| 4      | H <sub>17</sub> | N <sub>2</sub>  | 2.659      |
| 5      | H <sub>18</sub> | F <sub>3</sub>  | 2.606      |
| 6      | F <sub>3</sub>  | H <sub>18</sub> | 2.606      |
| 7      | H <sub>17</sub> | N <sub>2</sub>  | 2.659      |
| 8      | F <sub>1</sub>  | H <sub>11</sub> | 2.52       |
| 9      | H <sub>18</sub> | F <sub>3</sub>  | 2.606      |
| 10     | N <sub>2</sub>  | H <sub>17</sub> | 2.659      |
| 11     | H <sub>11</sub> | F <sub>1</sub>  | 2.52       |
| 12     | F <sub>3</sub>  | H <sub>18</sub> | 2.606      |

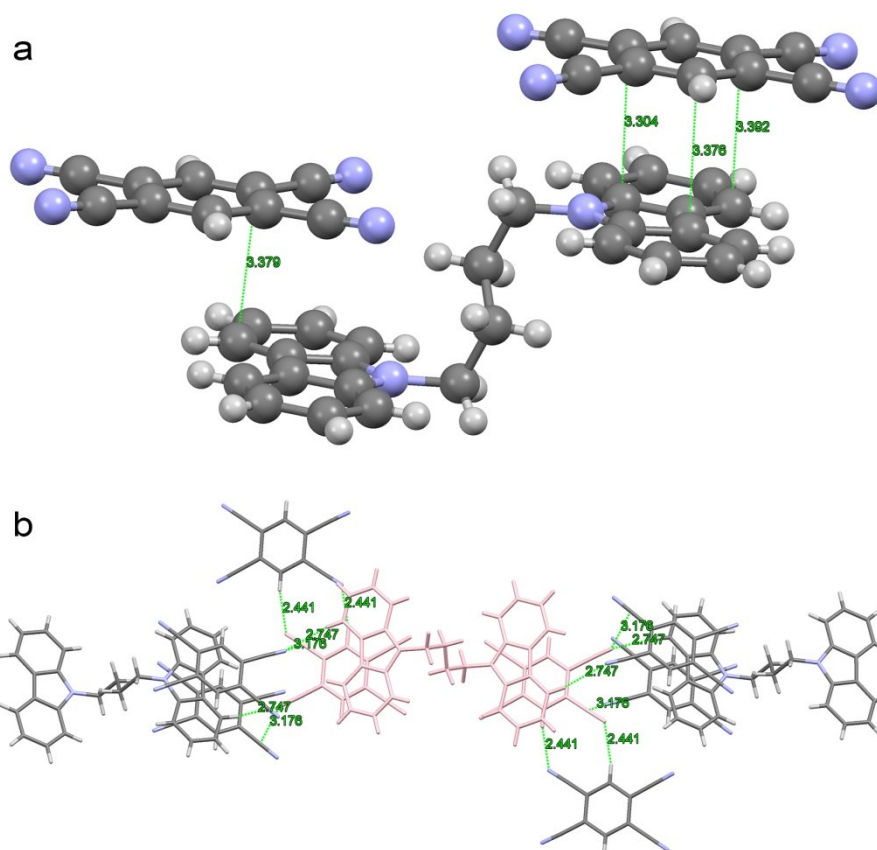

**Figure S5.** Intermolecular interactions in (a) intra-column and (b) inter-column in C2 crystal.

**Table S4.** The distance data of short interactions in Figure S3a.

| Number | Object1         | Object2         | Length (Å) |
|--------|-----------------|-----------------|------------|
| 1      | C <sub>17</sub> | C <sub>12</sub> | 3.304(2)   |
| 2      | C <sub>21</sub> | C <sub>6</sub>  | 3.376(3)   |
| 3      | C <sub>19</sub> | C <sub>8</sub>  | 3.392(3)   |
| 4      | C <sub>16</sub> | C <sub>5</sub>  | 3.379(3)   |



**Table S5.** The distance data of short interactions in Figure S3b.

| Number | Object1         | Object2         | Length (Å) |
|--------|-----------------|-----------------|------------|
| 1      | H <sub>18</sub> | N=              | 2.441      |
| 2      | N <sub>4</sub>  | H <sub>18</sub> | 2.441      |
| 3      | C <sub>23</sub> | N <sub>5</sub>  | 3.176(3)   |
| 4      | N <sub>5</sub>  | C <sub>23</sub> | 3.176(3)   |
| 5      | N <sub>5</sub>  | H <sub>8</sub>  | 2.747      |
| 6      | H <sub>8</sub>  | N <sub>5</sub>  | 2.747      |
| 7      | H <sub>18</sub> | N <sub>4</sub>  | 2.441      |
| 8      | N <sub>4</sub>  | H <sub>18</sub> | 2.441      |
| 9      | H <sub>8</sub>  | N <sub>5</sub>  | 2.747      |
| 10     | C <sub>23</sub> | N <sub>5</sub>  | 3.176(3)   |
| 11     | N <sub>5</sub>  | H <sub>8</sub>  | 2.747      |
| 12     | N <sub>5</sub>  | C <sub>23</sub> | 3.176(3)   |

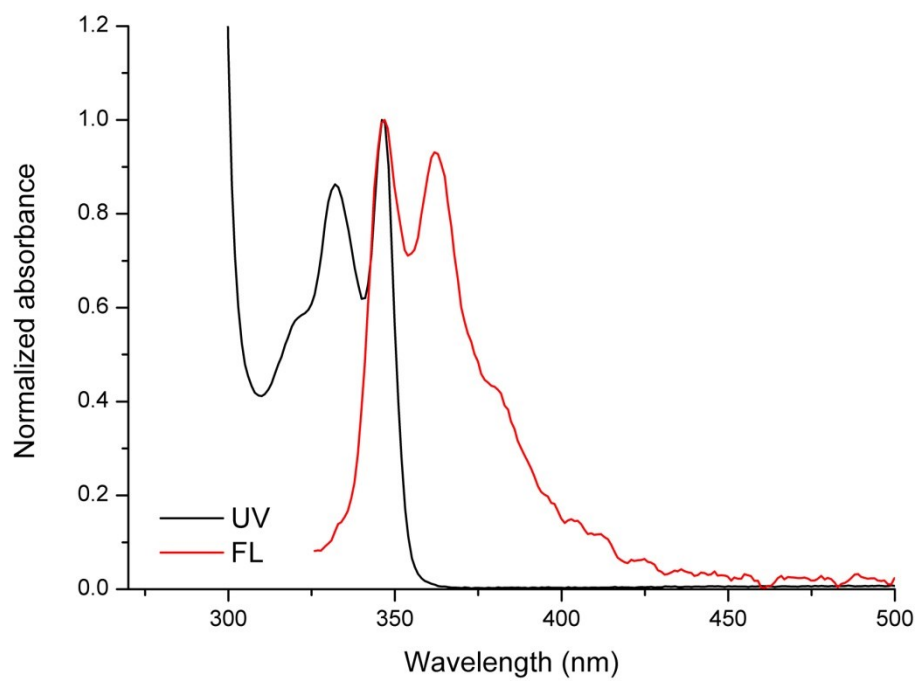

**Figure S6.** Normalized absorption and emission spectra of CC4C in toluene ( $10^{-5}$  M).

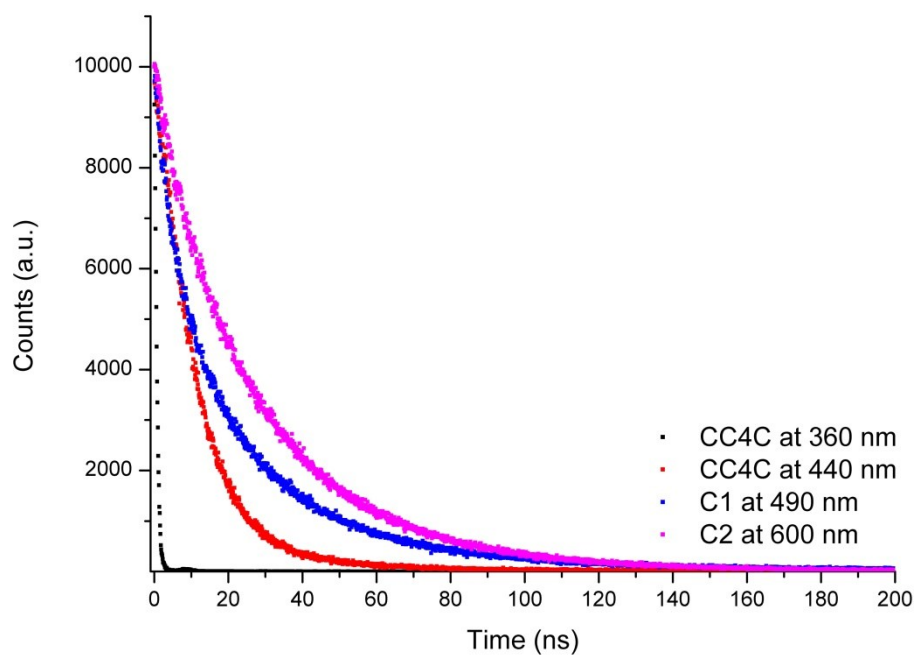

**Figure S7.** Decay curves of CC4C, C1 and C2 crystals.  $\lambda_{\text{ex}}$  is 340 nm for CC4C and C1 crystals, and is 460 nm for C2 crystals.

**Table S6.** Electron transition data of C1 and C2 by quantum chemical calculations.

|          | Transition            | Transition assignment          | E (eV) | $\lambda_{\text{abs}}$ (nm) | Oscillator strength |
|----------|-----------------------|--------------------------------|--------|-----------------------------|---------------------|
| C1 (2:1) | $S_0 \rightarrow S_1$ | H-1 $\rightarrow$ L (40.8 %)   | 3.1723 | 390.83                      | 0.0009              |
|          |                       | H $\rightarrow$ L (58.0 %)     |        |                             |                     |
| C1 (2:1) | $S_0 \rightarrow S_2$ | H-1 $\rightarrow$ L+1 (51.8 %) | 3.1827 | 389.55                      | 0.0008              |
|          |                       | H $\rightarrow$ L+1 (46.8 %)   |        |                             |                     |
| C2 (2:1) | $S_0 \rightarrow S_1$ | H-1 $\rightarrow$ L+1 (47.0 %) | 2.7142 | 456.80                      | 0.0145              |
|          |                       | H $\rightarrow$ L (52.3 %)     |        |                             |                     |
| C2 (2:1) | $S_0 \rightarrow S_2$ | H-1 $\rightarrow$ L (47.1 %)   | 2.7154 | 456.59                      | 0.0007              |
|          |                       | H $\rightarrow$ L+1 (52.2 %)   |        |                             |                     |

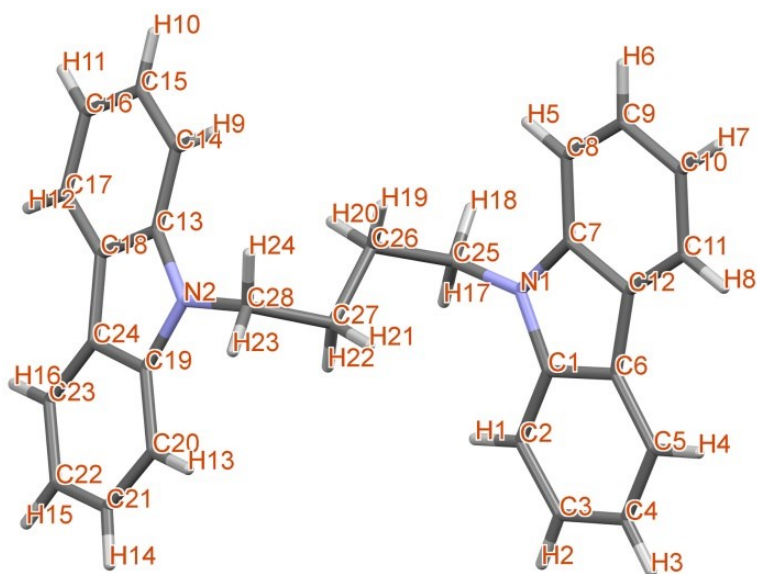

**Table S7.** Atom coordinates in CC4C crystal.

| Number | Label | X           | Y           | Z           |
|--------|-------|-------------|-------------|-------------|
| 1      | N1    | 0.18109(19) | 0.65960(19) | 0.26657(7)  |
| 2      | N2    | 0.46579(18) | 0.54281(19) | 0.08511(7)  |
| 3      | C1    | 0.2768(2)   | 0.6410(2)   | 0.30842(9)  |
| 4      | C2    | 0.4173(2)   | 0.6922(2)   | 0.31337(10) |
| 5      | H1    | 0.4614      | 0.7485      | 0.2857      |
| 6      | C3    | 0.4897(3)   | 0.6583(3)   | 0.35975(10) |
| 7      | H2    | 0.5853      | 0.6924      | 0.3641      |
| 8      | C4    | 0.4263(3)   | 0.5748(3)   | 0.40069(10) |
| 9      | H3    | 0.4795      | 0.5524      | 0.432       |
| 10     | C5    | 0.2869(3)   | 0.5247(2)   | 0.39593(9)  |
| 11     | H4    | 0.2441      | 0.468       | 0.4237      |
| 12     | C6    | 0.2102(2)   | 0.5587(2)   | 0.34974(9)  |
| 13     | C7    | 0.0522(2)   | 0.5928(2)   | 0.28070(9)  |
| 14     | C8    | -0.0761(2)  | 0.5883(3)   | 0.25220(9)  |
| 15     | H5    | -0.0859     | 0.6355      | 0.2183      |
| 16     | C9    | -0.1884(3)  | 0.5118(3)   | 0.27564(10) |
| 17     | H6    | -0.2772     | 0.5066      | 0.2573      |
| 18     | C10   | -0.1754(3)  | 0.4420(3)   | 0.3254(1)   |
| 19     | H7    | -0.2542     | 0.3885      | 0.3399      |
| 20     | C11   | -0.0487(3)  | 0.4503(2)   | 0.35363(9)  |
| 21     | H8    | -0.0401     | 0.404       | 0.3877      |
| 22     | C12   | 0.0664(2)   | 0.5273(2)   | 0.33158(9)  |
| 23     | C13   | 0.3949(2)   | 0.6251(2)   | 0.04517(8)  |
| 24     | C14   | 0.2522(2)   | 0.6227(2)   | 0.03012(9)  |
| 25     | H9    | 0.1864      | 0.5577      | 0.0478      |
| 26     | C15   | 0.2092(2)   | 0.7171(3)   | -0.01110(9) |

---

|    |     |           |           |             |
|----|-----|-----------|-----------|-------------|
| 27 | H10 | 0.1119    | 0.7177    | -0.0218     |
| 28 | C16 | 0.3058(2) | 0.8127(2) | -0.03777(9) |
| 29 | H11 | 0.273     | 0.8774    | -0.066      |
| 30 | C17 | 0.4478(2) | 0.8139(2) | -0.02339(9) |
| 31 | H12 | 0.5131    | 0.8783    | -0.0416     |
| 32 | C18 | 0.4941(2) | 0.7189(2) | 0.01838(8)  |
| 33 | C19 | 0.6090(2) | 0.5809(2) | 0.08409(8)  |
| 34 | C20 | 0.7200(2) | 0.5261(3) | 0.11611(9)  |
| 35 | H13 | 0.7041    | 0.4527    | 0.1436      |
| 36 | C21 | 0.8546(2) | 0.5830(3) | 0.10619(9)  |
| 37 | H14 | 0.9327    | 0.5458    | 0.1269      |
| 38 | C22 | 0.8788(2) | 0.6934(3) | 0.06664(10) |
| 39 | H15 | 0.9723    | 0.7318    | 0.0615      |
| 40 | C23 | 0.7681(2) | 0.7472(2) | 0.03492(9)  |
| 41 | H16 | 0.7849    | 0.822     | 0.0079      |
| 42 | C24 | 0.6313(2) | 0.6903(2) | 0.04313(8)  |
| 43 | C25 | 0.2071(2) | 0.7417(2) | 0.21732(9)  |
| 44 | H17 | 0.2891    | 0.813     | 0.2227      |
| 45 | H18 | 0.1232    | 0.8072    | 0.2084      |
| 46 | C26 | 0.2373(2) | 0.6340(2) | 0.17054(9)  |
| 47 | H19 | 0.1553    | 0.5626    | 0.1653      |
| 48 | H20 | 0.2443    | 0.6994    | 0.1384      |
| 49 | C27 | 0.3715(2) | 0.5355(2) | 0.17596(9)  |
| 50 | H21 | 0.3607    | 0.4607    | 0.2055      |
| 51 | H22 | 0.4528    | 0.6051    | 0.1847      |
| 52 | C28 | 0.4035(2) | 0.4442(2) | 0.12563(9)  |
| 53 | H23 | 0.4698    | 0.3574    | 0.1344      |
| 54 | H24 | 0.3143    | 0.3974    | 0.1115      |

---

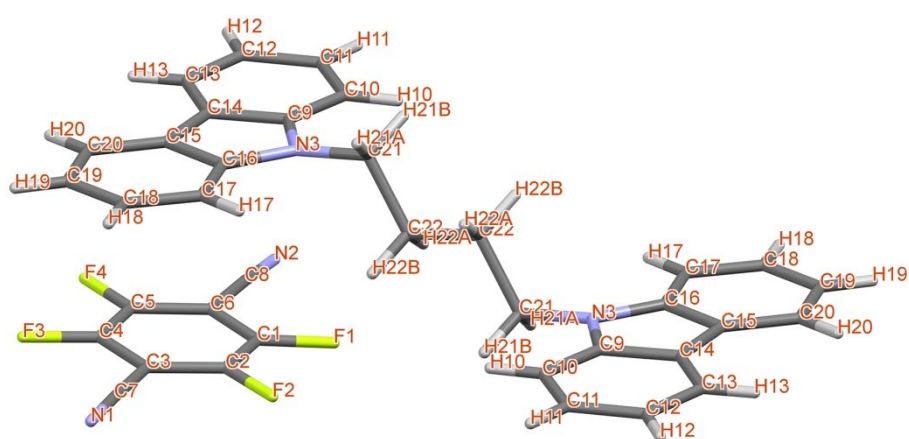

**Table S8.** Atom coordinates in C1 crystal.

| Number | Label | X         | Y          | Z          |
|--------|-------|-----------|------------|------------|
| 1      | N3    | 0.3343(2) | 0.1899(2)  | 0.41561(5) |
| 2      | C9    | 0.2784(2) | 0.3514(2)  | 0.41476(6) |
| 3      | C10   | 0.2252(2) | 0.4497(2)  | 0.45000(7) |
| 4      | H10   | 0.2287    | 0.4121     | 0.4795     |
| 5      | C11   | 0.1669(2) | 0.6060(3)  | 0.43932(7) |
| 6      | H11   | 0.1289    | 0.6741     | 0.4621     |
| 7      | C12   | 0.1638(2) | 0.6636(3)  | 0.39525(7) |
| 8      | H12   | 0.1226    | 0.7687     | 0.3892     |
| 9      | C13   | 0.2207(2) | 0.5674(2)  | 0.36046(7) |
| 10     | H13   | 0.2207    | 0.6076     | 0.3313     |
| 11     | C14   | 0.2784(2) | 0.4085(2)  | 0.36986(6) |
| 12     | C15   | 0.3381(2) | 0.2754(2)  | 0.34265(6) |
| 13     | C16   | 0.3713(2) | 0.1430(2)  | 0.37212(6) |
| 14     | C17   | 0.4322(2) | -0.0060(2) | 0.35667(7) |
| 15     | H17   | 0.4552    | -0.0924    | 0.3762     |
| 16     | C18   | 0.4576(2) | -0.0213(3) | 0.31114(7) |
| 17     | H18   | 0.4969    | -0.1203    | 0.3        |
| 18     | C19   | 0.4257(2) | 0.1079(3)  | 0.28159(7) |
| 19     | H19   | 0.4454    | 0.0941     | 0.2512     |
| 20     | C20   | 0.3651(2) | 0.2562(3)  | 0.29690(6) |
| 21     | H20   | 0.3428    | 0.3418     | 0.277      |
| 22     | C21   | 0.3265(2) | 0.0806(2)  | 0.45394(7) |
| 23     | H21A  | 0.2874    | -0.0256    | 0.4431     |
| 24     | H21B  | 0.2318    | 0.1198     | 0.4735     |
| 25     | C22   | 0.5086(2) | 0.0622(2)  | 0.48144(6) |
| 26     | H22A  | 0.544     | 0.1661     | 0.4945     |
| 27     | H22B  | 0.6062    | 0.0289     | 0.4619     |
| 28     | N3    | 0.6657(2) | -0.1899(2) | 0.58439(5) |
| 29     | C9    | 0.7216(2) | -0.3514(2) | 0.58524(6) |
| 30     | C10   | 0.7748(2) | -0.4497(2) | 0.55000(7) |

---

|    |      |             |             |            |
|----|------|-------------|-------------|------------|
| 31 | H10  | 0.7713      | -0.4121     | 0.5205     |
| 32 | C11  | 0.8331(2)   | -0.6060(3)  | 0.56068(7) |
| 33 | H11  | 0.8711      | -0.6741     | 0.5379     |
| 34 | C12  | 0.8362(2)   | -0.6636(3)  | 0.60475(7) |
| 35 | H12  | 0.8774      | -0.7687     | 0.6108     |
| 36 | C13  | 0.7793(2)   | -0.5674(2)  | 0.63954(7) |
| 37 | H13  | 0.7793      | -0.6076     | 0.6687     |
| 38 | C14  | 0.7216(2)   | -0.4085(2)  | 0.63014(6) |
| 39 | C15  | 0.6619(2)   | -0.2754(2)  | 0.65735(6) |
| 40 | C16  | 0.6287(2)   | -0.1430(2)  | 0.62788(6) |
| 41 | C17  | 0.5678(2)   | 0.0060(2)   | 0.64333(7) |
| 42 | H17  | 0.5448      | 0.0924      | 0.6238     |
| 43 | C18  | 0.5424(2)   | 0.0213(3)   | 0.68886(7) |
| 44 | H18  | 0.5031      | 0.1203      | 0.7        |
| 45 | C19  | 0.5743(2)   | -0.1079(3)  | 0.71841(7) |
| 46 | H19  | 0.5546      | -0.0941     | 0.7488     |
| 47 | C20  | 0.6349(2)   | -0.2562(3)  | 0.70310(6) |
| 48 | H20  | 0.6572      | -0.3418     | 0.723      |
| 49 | C21  | 0.6735(2)   | -0.0806(2)  | 0.54606(7) |
| 50 | H21A | 0.7126      | 0.0256      | 0.5569     |
| 51 | H21B | 0.7682      | -0.1198     | 0.5265     |
| 52 | C22  | 0.4914(2)   | -0.0622(2)  | 0.51856(6) |
| 53 | H22A | 0.456       | -0.1661     | 0.5055     |
| 54 | H22B | 0.3938      | -0.0289     | 0.5381     |
| 55 | F1   | 0.81058(15) | 0.31716(14) | 0.45392(4) |
| 56 | F2   | 0.91610(14) | 0.04480(14) | 0.41189(4) |
| 57 | F3   | 0.82926(16) | 0.30763(16) | 0.27225(4) |
| 58 | F4   | 0.71176(16) | 0.57614(15) | 0.31417(4) |
| 59 | N1   | 0.9802(2)   | -0.0922(2)  | 0.30281(7) |
| 60 | N2   | 0.6598(2)   | 0.7069(2)   | 0.42817(7) |
| 61 | C1   | 0.8117(2)   | 0.3137(2)   | 0.40907(6) |
| 62 | C2   | 0.8670(2)   | 0.1760(2)   | 0.38751(7) |
| 63 | C3   | 0.8738(2)   | 0.1705(2)   | 0.34118(7) |
| 64 | C4   | 0.8213(2)   | 0.3089(3)   | 0.31683(6) |
| 65 | C5   | 0.7634(3)   | 0.4460(3)   | 0.33833(7) |
| 66 | C6   | 0.7583(2)   | 0.4516(2)   | 0.38483(7) |
| 67 | C7   | 0.9324(3)   | 0.0254(3)   | 0.31920(7) |
| 68 | C8   | 0.7020(3)   | 0.5951(3)   | 0.40823(7) |

---



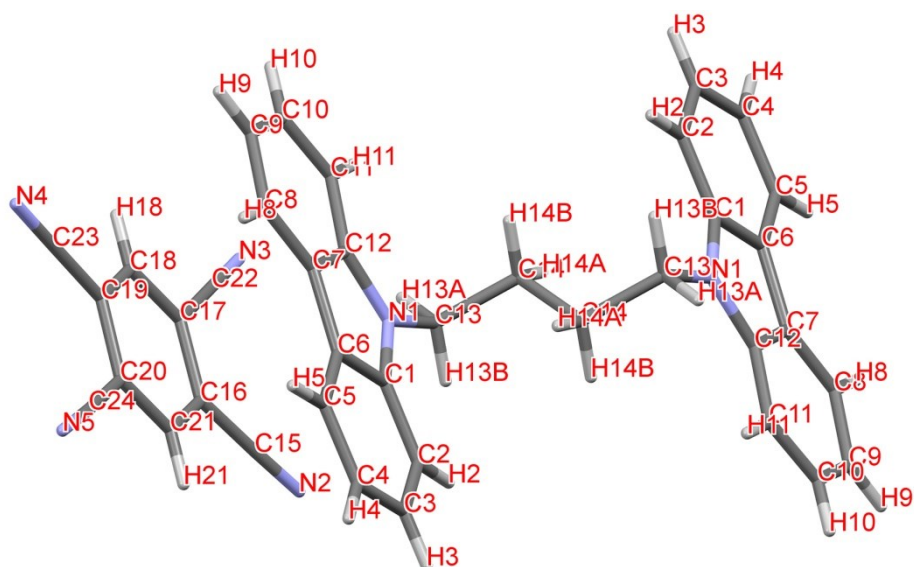

**Table S9.** Atom coordinates in C2 crystal.

| Number | Label | X           | Y            | Z           |
|--------|-------|-------------|--------------|-------------|
| 1      | N1    | 0.35705(9)  | 0.16804(19)  | 0.43434(8)  |
| 2      | C1    | 0.33980(11) | 0.1006(2)    | 0.35918(10) |
| 3      | C2    | 0.39279(13) | 0.0884(3)    | 0.29957(11) |
| 4      | H2    | 0.449513    | 0.127219     | 0.306575    |
| 5      | C3    | 0.35839(14) | 0.0170(3)    | 0.22993(11) |
| 6      | H3    | 0.392984    | 0.005483     | 0.189503    |
| 7      | C4    | 0.27308(15) | -0.0386(3)   | 0.21814(11) |
| 8      | H4    | 0.251679    | -0.085012    | 0.170031    |
| 9      | C5    | 0.22035(13) | -0.0257(2)   | 0.27656(10) |
| 10     | H5    | 0.163442    | -0.062747    | 0.268346    |
| 11     | C6    | 0.25327(11) | 0.0437(2)    | 0.34860(10) |
| 12     | C7    | 0.21756(11) | 0.0769(2)    | 0.42072(10) |
| 13     | C8    | 0.13672(12) | 0.0526(3)    | 0.44581(11) |
| 14     | H8    | 0.0926      | 0.000815     | 0.413066    |
| 15     | C9    | 0.12307(14) | 0.1065(3)    | 0.52003(12) |
| 16     | H9    | 0.069305    | 0.090764     | 0.537446    |
| 17     | C10   | 0.18894(14) | 0.1842(3)    | 0.56913(11) |
| 18     | H10   | 0.177871    | 0.221989     | 0.618536    |
| 19     | C11   | 0.26986(13) | 0.2067(2)    | 0.54658(10) |
| 20     | H11   | 0.313905    | 0.255862     | 0.58019     |
| 21     | C12   | 0.28336(11) | 0.1533(2)    | 0.47180(10) |
| 22     | C13   | 0.43984(11) | 0.2294(2)    | 0.47134(10) |
| 23     | H13A  | 0.431394    | 0.338219     | 0.502507    |
| 24     | H13B  | 0.476208    | 0.264281     | 0.431513    |
| 25     | C14   | 0.48488(11) | 0.0810(2)    | 0.52273(10) |
| 26     | H14A  | 0.533756    | 0.135854     | 0.552894    |
| 27     | H14B  | 0.445936    | 0.036138     | 0.55875     |
| 28     | N1    | 0.64295(9)  | -0.16804(19) | 0.56566(8)  |

---

|    |      |              |            |             |
|----|------|--------------|------------|-------------|
| 29 | C1   | 0.66020(11)  | -0.1006(2) | 0.64082(10) |
| 30 | C2   | 0.60721(13)  | -0.0884(3) | 0.70043(11) |
| 31 | H2   | 0.550487     | -0.127219  | 0.693425    |
| 32 | C3   | 0.64161(14)  | -0.0170(3) | 0.77007(11) |
| 33 | H3   | 0.607016     | -0.005483  | 0.810497    |
| 34 | C4   | 0.72692(15)  | 0.0386(3)  | 0.78186(11) |
| 35 | H4   | 0.748321     | 0.085012   | 0.829969    |
| 36 | C5   | 0.77965(13)  | 0.0257(2)  | 0.72344(10) |
| 37 | H5   | 0.836558     | 0.062747   | 0.731654    |
| 38 | C6   | 0.74673(11)  | -0.0437(2) | 0.65140(10) |
| 39 | C7   | 0.78244(11)  | -0.0769(2) | 0.57928(10) |
| 40 | C8   | 0.86328(12)  | -0.0526(3) | 0.55419(11) |
| 41 | H8   | 0.9074       | -0.000815  | 0.586934    |
| 42 | C9   | 0.87693(14)  | -0.1065(3) | 0.47997(12) |
| 43 | H9   | 0.930695     | -0.090764  | 0.462554    |
| 44 | C10  | 0.81106(14)  | -0.1842(3) | 0.43087(11) |
| 45 | H10  | 0.822129     | -0.221989  | 0.381464    |
| 46 | C11  | 0.73014(13)  | -0.2067(2) | 0.45342(10) |
| 47 | H11  | 0.686095     | -0.255862  | 0.41981     |
| 48 | C12  | 0.71664(11)  | -0.1533(2) | 0.52820(10) |
| 49 | C13  | 0.56016(11)  | -0.2294(2) | 0.52866(10) |
| 50 | H13A | 0.568606     | -0.338219  | 0.497493    |
| 51 | H13B | 0.523792     | -0.264281  | 0.568487    |
| 52 | C14  | 0.51512(11)  | -0.0810(2) | 0.47727(10) |
| 53 | H14A | 0.466244     | -0.135854  | 0.447106    |
| 54 | H14B | 0.554064     | -0.036138  | 0.44125     |
| 55 | N2   | 0.42728(12)  | 0.5941(3)  | 0.32971(12) |
| 56 | N3   | 0.34524(12)  | 0.7015(2)  | 0.53804(10) |
| 57 | N4   | -0.05648(12) | 0.4089(3)  | 0.40106(11) |
| 58 | N5   | 0.01679(12)  | 0.3285(3)  | 0.19761(11) |
| 59 | C15  | 0.35692(13)  | 0.5772(2)  | 0.33904(11) |
| 60 | C16  | 0.26836(11)  | 0.5509(2)  | 0.35146(10) |
| 61 | C17  | 0.24022(11)  | 0.5883(2)  | 0.42388(10) |
| 62 | C18  | 0.15574(11)  | 0.5575(2)  | 0.43716(10) |
| 63 | H18  | 0.137248     | 0.583125   | 0.485471    |
| 64 | C19  | 0.09919(11)  | 0.4883(2)  | 0.37813(10) |
| 65 | C20  | 0.12663(11)  | 0.4533(2)  | 0.30500(10) |
| 66 | C21  | 0.21105(12)  | 0.4841(2)  | 0.29197(11) |
| 67 | H21  | 0.229334     | 0.460011   | 0.24344     |
| 68 | C22  | 0.29880(13)  | 0.6543(3)  | 0.48707(11) |
| 69 | C23  | 0.01231(13)  | 0.4464(3)  | 0.39154(11) |
| 70 | C24  | 0.06643(13)  | 0.3830(3)  | 0.24429(11) |

---
